# Supplementary material
Source: publisher figshare collection journal article supplement (https://frontiersin.figshare.com/ndownloader/files/22583555)
Supplement: Supplementary file [file 22583555]

**Radiation-induced Secondary Cancer Risk Assessment in Patients with Lung Cancer after Stereotactic Body Radiotherapy using the CyberKnife M6 System with Lung-optimized Treatment**

Pei-Ju Chao PhD<sup>1,2</sup>, I-Hsing Tsai MS<sup>1</sup>, Chun-Chieh Huang MD<sup>2,\*</sup>, Chih-Hsueh Lin PhD<sup>1</sup>, Chin-Shiuh Shieh PhD<sup>1</sup>, Yang-Wei Hsieh MS<sup>1,2</sup>, Pei-Ying Yang MS<sup>1,2</sup>, Hsiao-Fei Lee PhD<sup>1,2</sup>, Tsair-Fwu Lee PhD<sup>1,2,3,\*</sup>,

**Supplementary Figures**

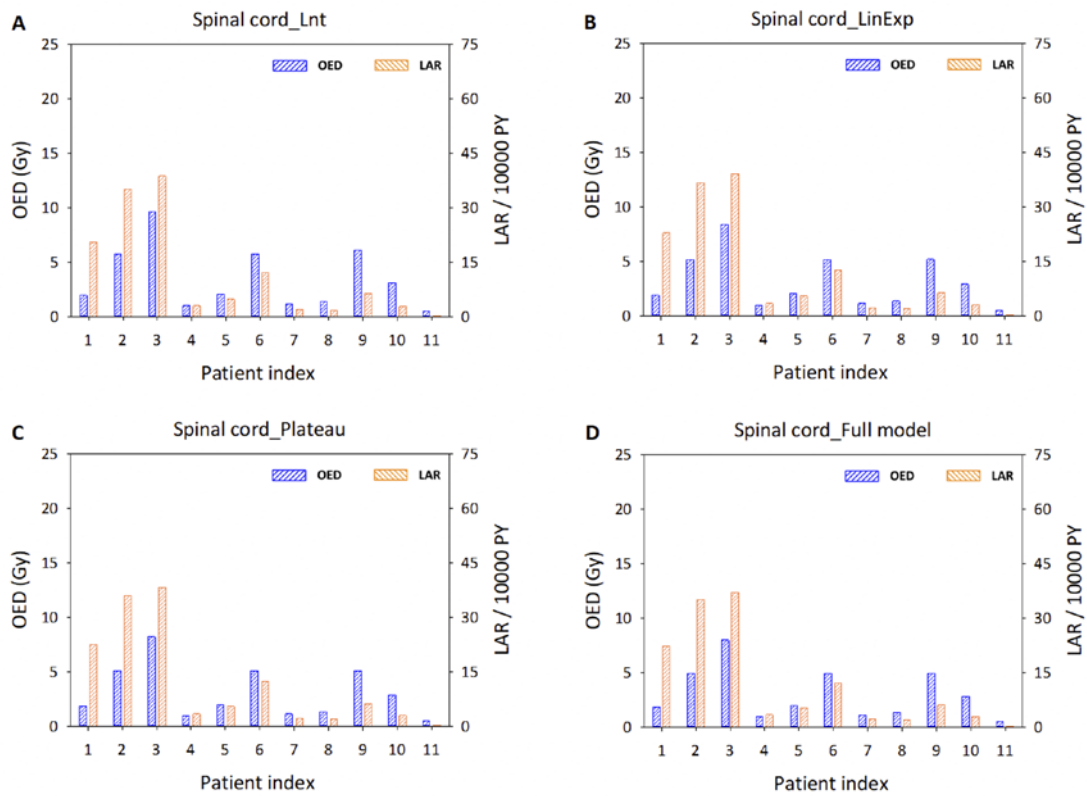

**Supplementary Figure S1.** OED/LAR of spinal cord for 11 patients using corresponding dose-response models **(A)** Lnt, **(B)** LinExp, **(C)** Plateau, **(D)** Full;

**Notes:** Patients were ordered by age from young to old; X axis: patient index; Y axis: OED (Left), LAR (Right); Unit is Gy (Left) and per 10,000 person-years (PY) (Right).

**Abbreviations:** Lnt, Linear-no-threshold dose response model; LinExp, Linear-exponential dose response model; Plateau, Plateau dose response model; Full, Schneider parameterization dose-response model; OED, Organ equivalent dose; LAR, Lifetime attributable risk; PTV, Planning target volume.

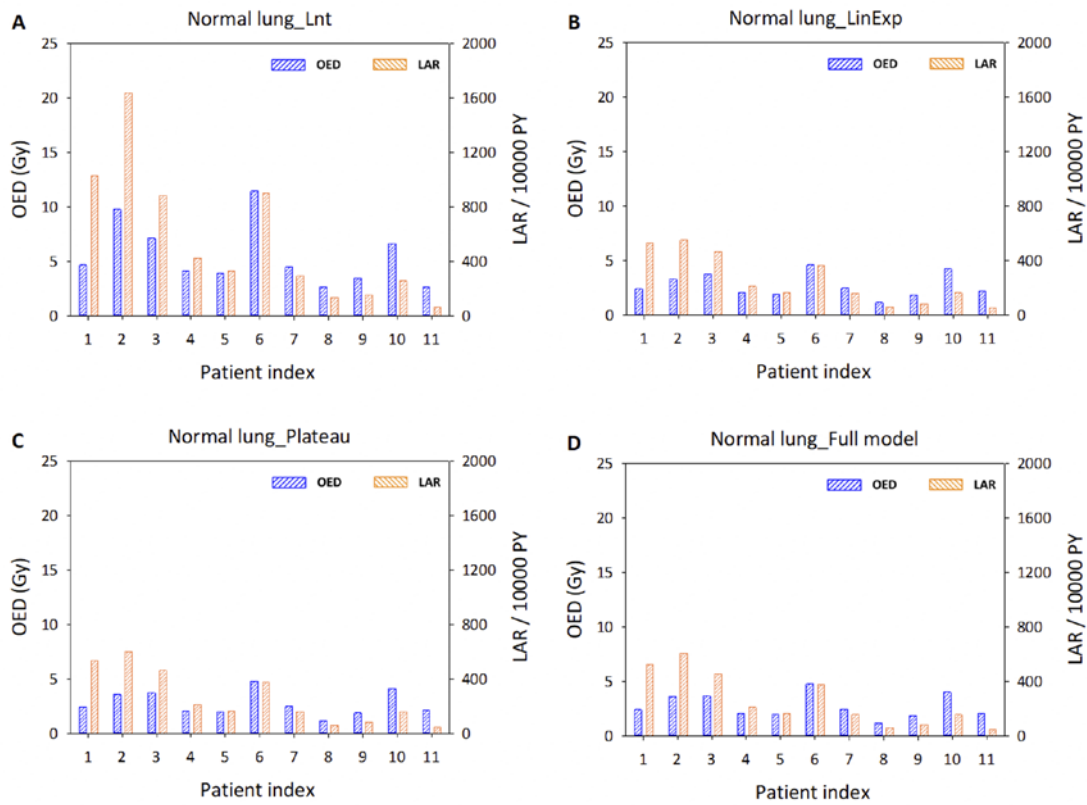

**Supplementary Figure S2.** OED/LAR of normal lung for 11 patients using corresponding dose-response models **(A)** Lnt, **(B)** LinExp, **(C)** Plateau, **(D)** Full;

**Notes:** Patients were ordered by age from young to old; X axis: patient index; Y axis: OED (Left), LAR (Right); Unit is Gy (Left) and per 10,000 person-years (PY) (Right).

**Abbreviations:** Lnt, Linear-no-threshold dose response model; LinExp, Linear-exponential dose response model; Plateau, Plateau dose response model; Full, Schneider parameterization dose-response model; OED, Organ equivalent dose; LAR, Lifetime attributable risk; PTV, Planning target volume.

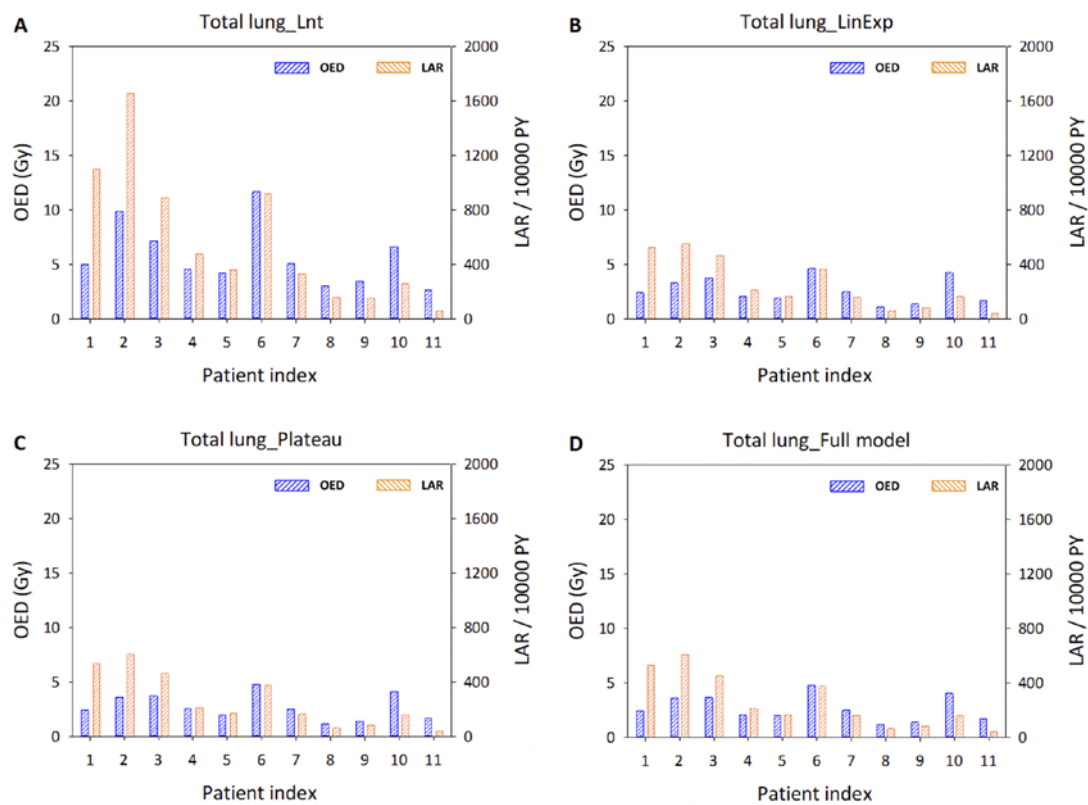

**Supplementary Figure S3.** OED/LAR of total lung for 11 patients using corresponding dose-response models **(A)** Lnt, **(B)** LinExp, **(C)** Plateau, **(D)** Full;

**Notes:** Patients were ordered by age from young to old; X axis: patient index; Y axis: OED (Left), LAR (Right); Unit is Gy (Left) and per 10,000 person-years (PY) (Right).

**Abbreviations:** Lnt, Linear-no-threshold dose response model; LinExp, Linear-exponential dose response model; Plateau, Plateau dose response model; Full, Schneider parameterization dose-response model; OED, Organ equivalent dose; LAR, Lifetime attributable risk; PTV, Planning target volume.

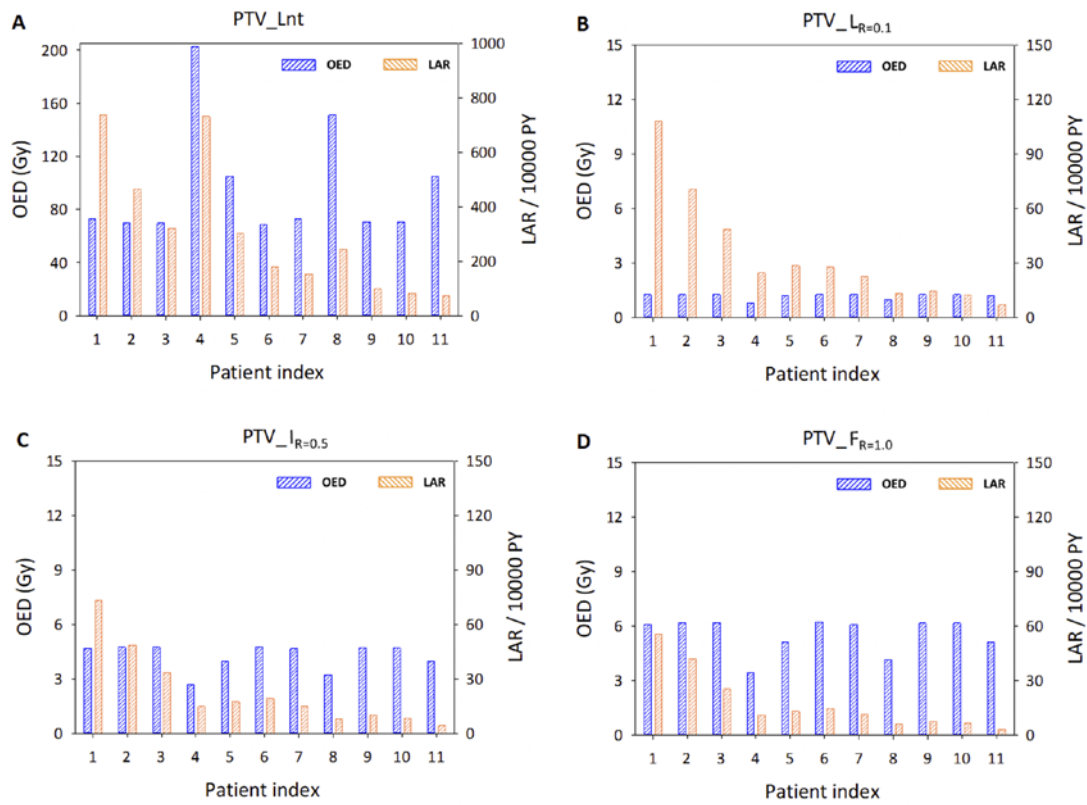

**Supplementary Figure S4.** OED/LAR of PTV for 11 patients using corresponding dose-response models **(A)** Lnt, **(B)** Low repopulation ( $L_{R=0.1}$ )  $R = 0.1$ , **(C)** Intermediate repopulation ( $I_{R=0.5}$ )  $R = 0.5$ , **(D)** Full tissue recovery models ( $F_{R=1.0}$ )  $R = 1.0$ ;

**Notes:** Patients were ordered by age from young to old; X axis: patient index; Y axis: OED (Left), LAR (Right); Unit is Gy (Left) and per 10,000 person-years (PY) (Right).

**Abbreviations:** Lnt, Linear-no-threshold dose response model; Full, Schneider parameterization dose-response model; Low repopulation ( $L_{R=0.1}$ )  $R = 0.1$ , Intermediate repopulation ( $I_{R=0.5}$ )  $R = 0.5$ , Full tissue recovery models ( $F_{R=1.0}$ )  $R = 1.0$ ; OED, Organ equivalent dose; LAR, Lifetime attributable risk; PTV, Planning target volume.
